# Supplementary material for: BaAl4 derivative phases in the sections {La,Ce}Ni2Si2–{La,Ce}Zn2Si2: phase relations, crystal structures and physical properties
Source: Royal Society of Chemistry journal article supplement (doi:10.1039/c5dt04705f), 2016-01-01
Supplement: c5dt04705f1.pdf [file c5dt04705f1.pdf]

## Supplementary Material

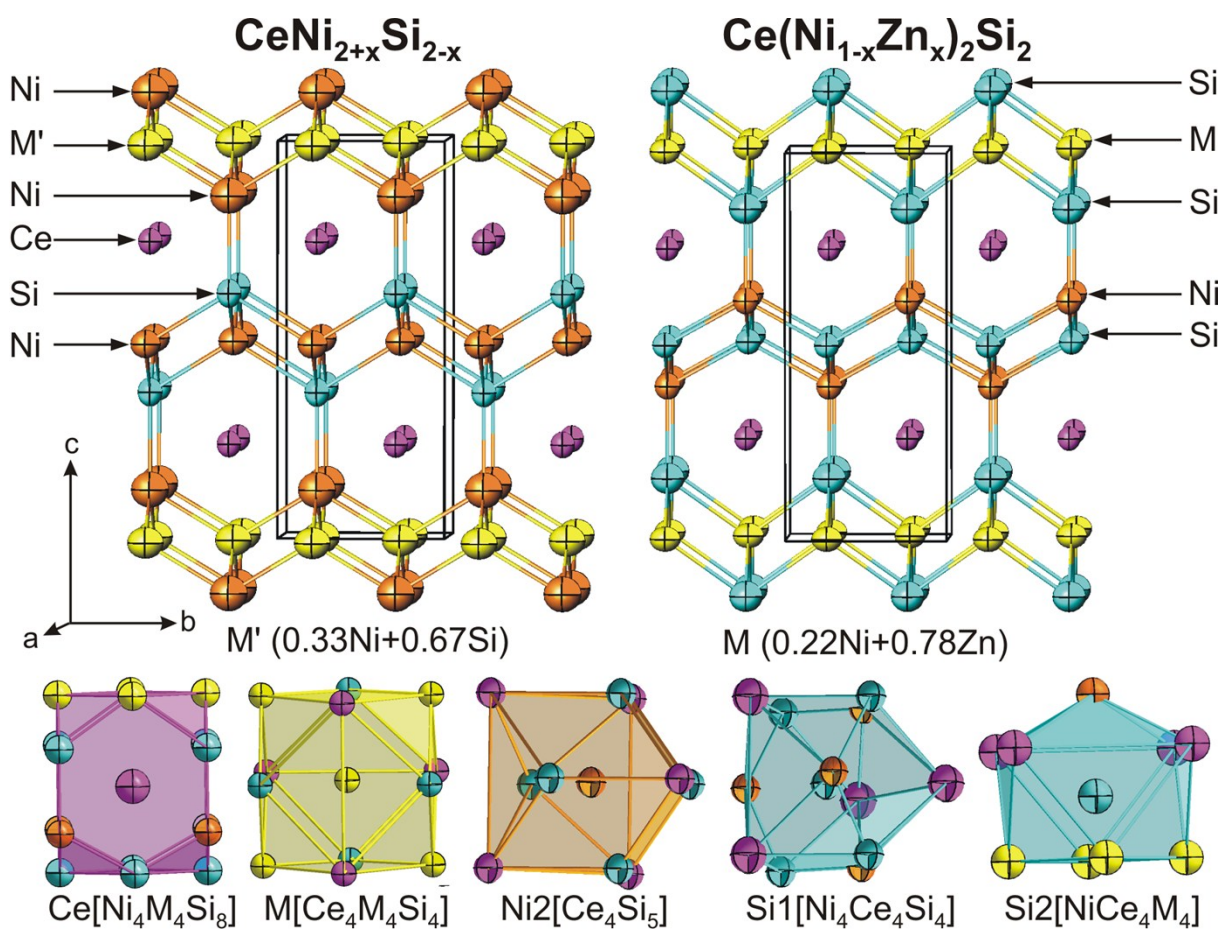

Figure I of Supplementary Material: Atom site distribution for ternary  $\text{CeNi}_{2+x}\text{Si}_{2-x}$  ( $\text{CaBe}_2\text{Ge}_2$ -type; left) and atom site exchange arrangement in isopointal quaternary  $\text{Ce}(\text{Ni}_{1-x}\text{Zn}_x)_2\text{Si}_2$  ( $\text{CaBe}_2\text{Ge}_2$ -type; right). Coordination polyhedra are presented for quaternary  $\text{Ce}(\text{Ni}_{1-x}\text{Zn}_x)_2\text{Si}_2$ . Atoms in blue are presented with ADPs from single crystal refinement.

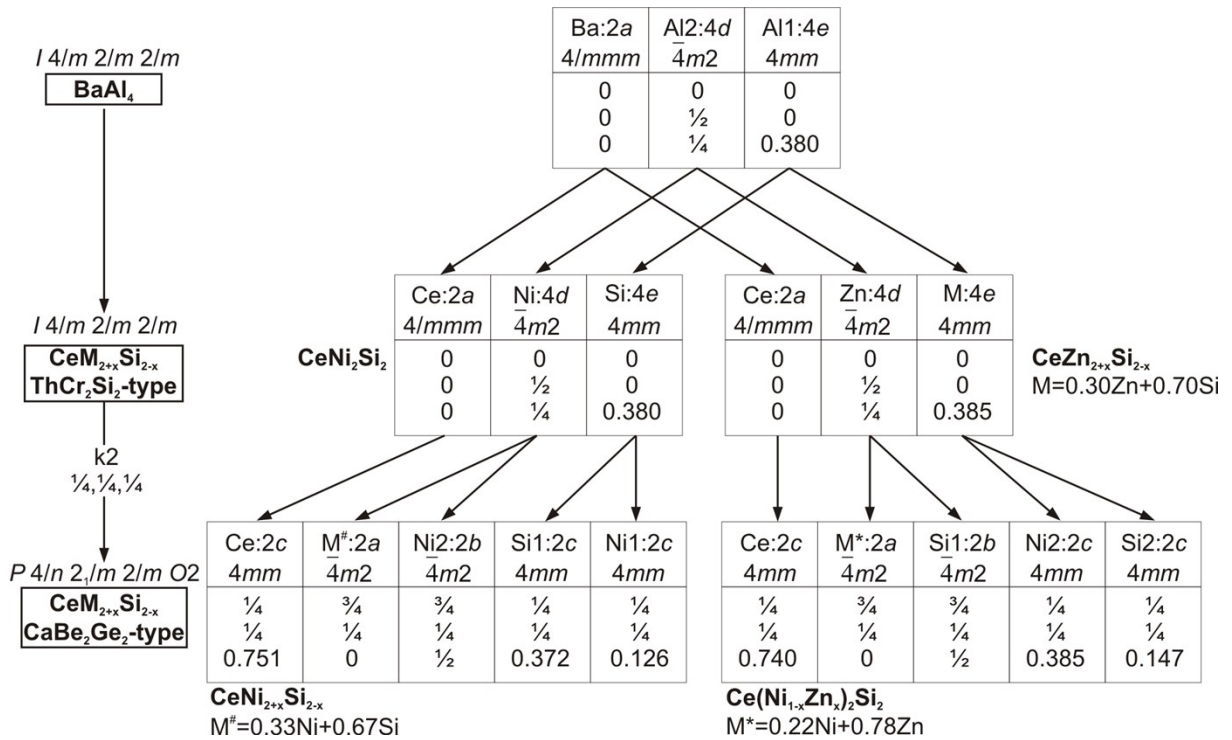

Figure II of Supplementary Material: Bärnighausen tree for the group-subgroup relation in the BaAl<sub>4</sub> family emphasizing on the various atom site occupation modes in the corresponding phases of the system Ce-Ni-Zn-Si.

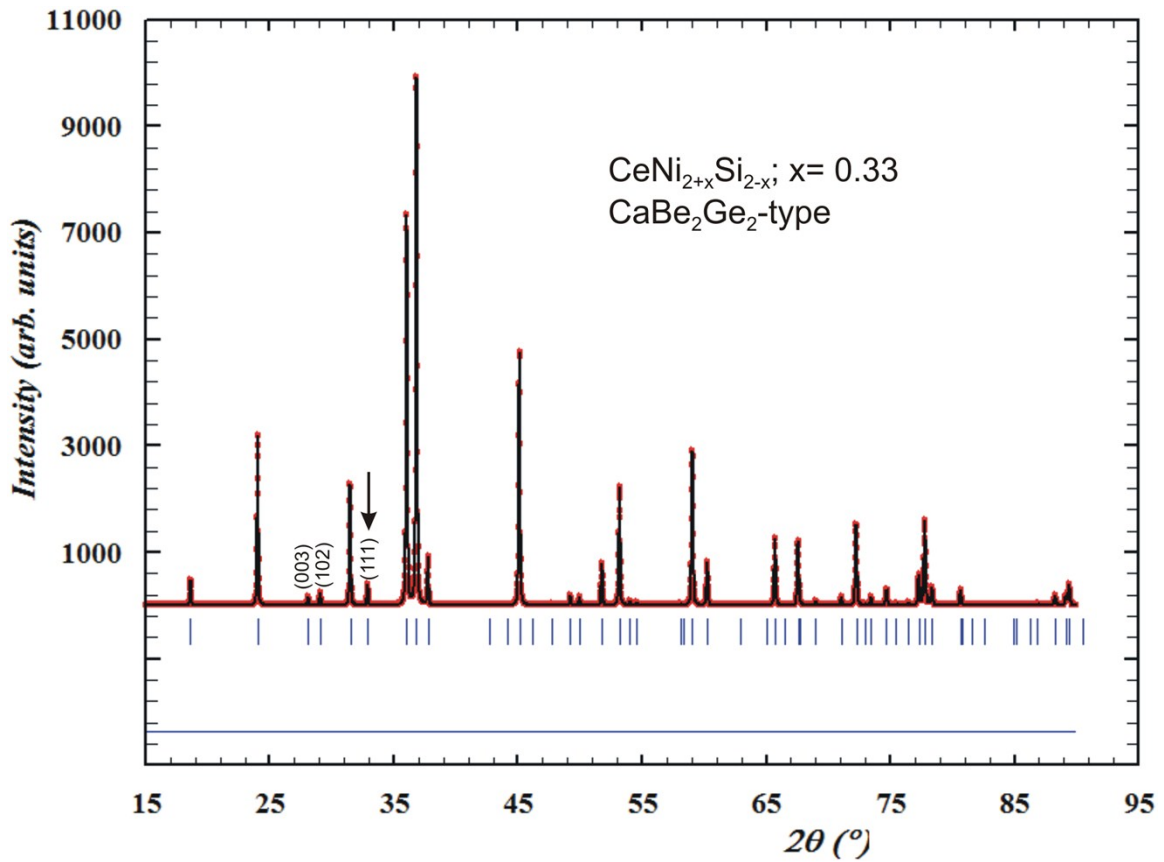

Figure III of Supplementary Material: Simulated powder diffraction pattern of the  $\text{CaBe}_2\text{Ge}_2$ -type  $\text{CeNi}_{2+x}\text{Si}_{2-x}; x=0.33$  based on the single crystal data. The strongest primitive reflection (111) is marked with arrow.
